# Supplementary material for: Tissue Oxygenation Changes After Transfusion and Outcomes in Preterm Infants: A Secondary Near-Infrared Spectroscopy Study of the Transfusion of Prematures Randomized Clinical Trial (TOP NIRS)
Source: PubMed Central journal article supplement (PMC10514737; doi:10.1001/jamanetworkopen.2023.34889), 2023-09-21
Supplement: jamanetwopen-e2334889-s002.pdf [file jamanetwopen-e2334889-s002.pdf]

## Supplemental Online Content

Chock VY, Kirpalani H, Bell EF, et al; Eunice Kennedy Shriver National Institute of Child Health and Human Development Neonatal Research Network. Tissue oxygenation changes after transfusion and outcomes in preterm infants: a secondary near-infrared spectroscopy study of the Transfusion of Prematures randomized clinical trial (TOP NIRS). *JAMA Netw Open*. 2023;6(9):e2334889.  
doi:10.1001/jamanetworkopen.2023.34889

**eTable 1.** Hemoglobin Transfusion Thresholds

**eTable 2.** CART Variables

**eFigure.** Flow Diagram

This supplemental material has been provided by the authors to give readers additional information about their work.

**eTable 1. Hemoglobin Transfusion Thresholds**

| <b>Postnatal Age</b> | <b>High Hgb threshold (g/dl)</b> |                               | <b>Low Hgb threshold (g/dl)</b> |                               |
|----------------------|----------------------------------|-------------------------------|---------------------------------|-------------------------------|
|                      | <b>Respiratory support*</b>      | <b>No respiratory support</b> | <b>Respiratory support*</b>     | <b>No respiratory support</b> |
| Week 1               | 13.0                             | 12.0                          | 11.0                            | 10.0                          |
| Week 2               | 12.5                             | 11.0                          | 10.0                            | 8.5                           |
| Week ≥3              | 11.0                             | 10.0                          | 8.5                             | 7.0                           |

\*Respiratory support defined as mechanical ventilation, continuous positive airway pressure, fraction of inspired oxygen >0.35, or nasal cannula flow ≥ 1 liter per minute

**eTable 2. Variables used for CART analysis to predict death or NDI\***

| Category                          | Variable included for model development                     |
|-----------------------------------|-------------------------------------------------------------|
| Demographics                      |                                                             |
|                                   | Gestation (in completed weeks)                              |
|                                   | Sex                                                         |
|                                   | Birth weight (g)                                            |
|                                   | Singleton                                                   |
|                                   | Antenatal steroids given                                    |
|                                   | Private insurance                                           |
|                                   | Maternal education level <sup>a</sup>                       |
| Clinical factors                  |                                                             |
|                                   | Days of ventilation within first 28 days                    |
|                                   | Total days on ventilation                                   |
|                                   | Days of parenteral alimentation                             |
|                                   | Necrotizing enterocolitis <sup>b</sup>                      |
|                                   | Abnormal head ultrasound <sup>c</sup>                       |
|                                   | Any sepsis (early or late onset)                            |
|                                   | Ventriculomegaly <sup>d</sup>                               |
| NIRS measures                     |                                                             |
|                                   | Pre-transfusion mean Csat <sup>e</sup>                      |
|                                   | Pre-transfusion mean cFTOE <sup>e</sup>                     |
|                                   | Delta Csat <sup>e</sup>                                     |
|                                   | Delta cFTOE <sup>e</sup>                                    |
|                                   | Csat <50% in first 72 hours                                 |
|                                   | % time Csat <50% in first 72 hours                          |
|                                   | Total transfusions with mean pre-transfusion Csat <50%      |
|                                   | Total transfusions with mean post-transfusion Csat <50%     |
| Hemoglobin or transfusion factors |                                                             |
|                                   | Hemoglobin transfusion threshold (high vs. low)             |
|                                   | Total transfusions                                          |
|                                   | Total transfusions triggered per protocol                   |
|                                   | Total transfusions with NIRS measures available             |
|                                   | Hemoglobin at randomization <sup>e</sup>                    |
|                                   | Hemoglobin triggering transfusion per protocol <sup>e</sup> |
|                                   | Mean hemoglobin over entire study period <sup>e</sup>       |

\*The importance of each predictor was set as the attributable change in the residual sum of squares (RSS) over all node splits of the tree. The entropy method was used to select the variables for the tree, the cost-complexity method was used to prune it, and each leaf was restricted to a minimum number of 10 observations. NIRS = near-infrared spectroscopy; Csat = cerebral saturation; cFTOE = cerebral fractional tissue oxygen extraction; <sup>a</sup>Three-level categorical variable; <sup>b</sup>Modified Bell stage II or higher; <sup>c</sup>Severe intraventricular hemorrhage (grade 3 or 4), cerebellar hemorrhage, intraparenchymal echodensity, periventricular leukomalacia, or ventriculomegaly on cranial ultrasound obtained prior to discharge; <sup>d</sup>Seen if concurrent intraventricular hemorrhage grade 2 or higher; <sup>e</sup>Variables summarized at the infant level over the entire study period and also separately for the following time periods: first postnatal week, after the first postnatal week, up to 28 days, after 28 days, from 8-28 days

eFigure. Flow Diagram of Enrollment

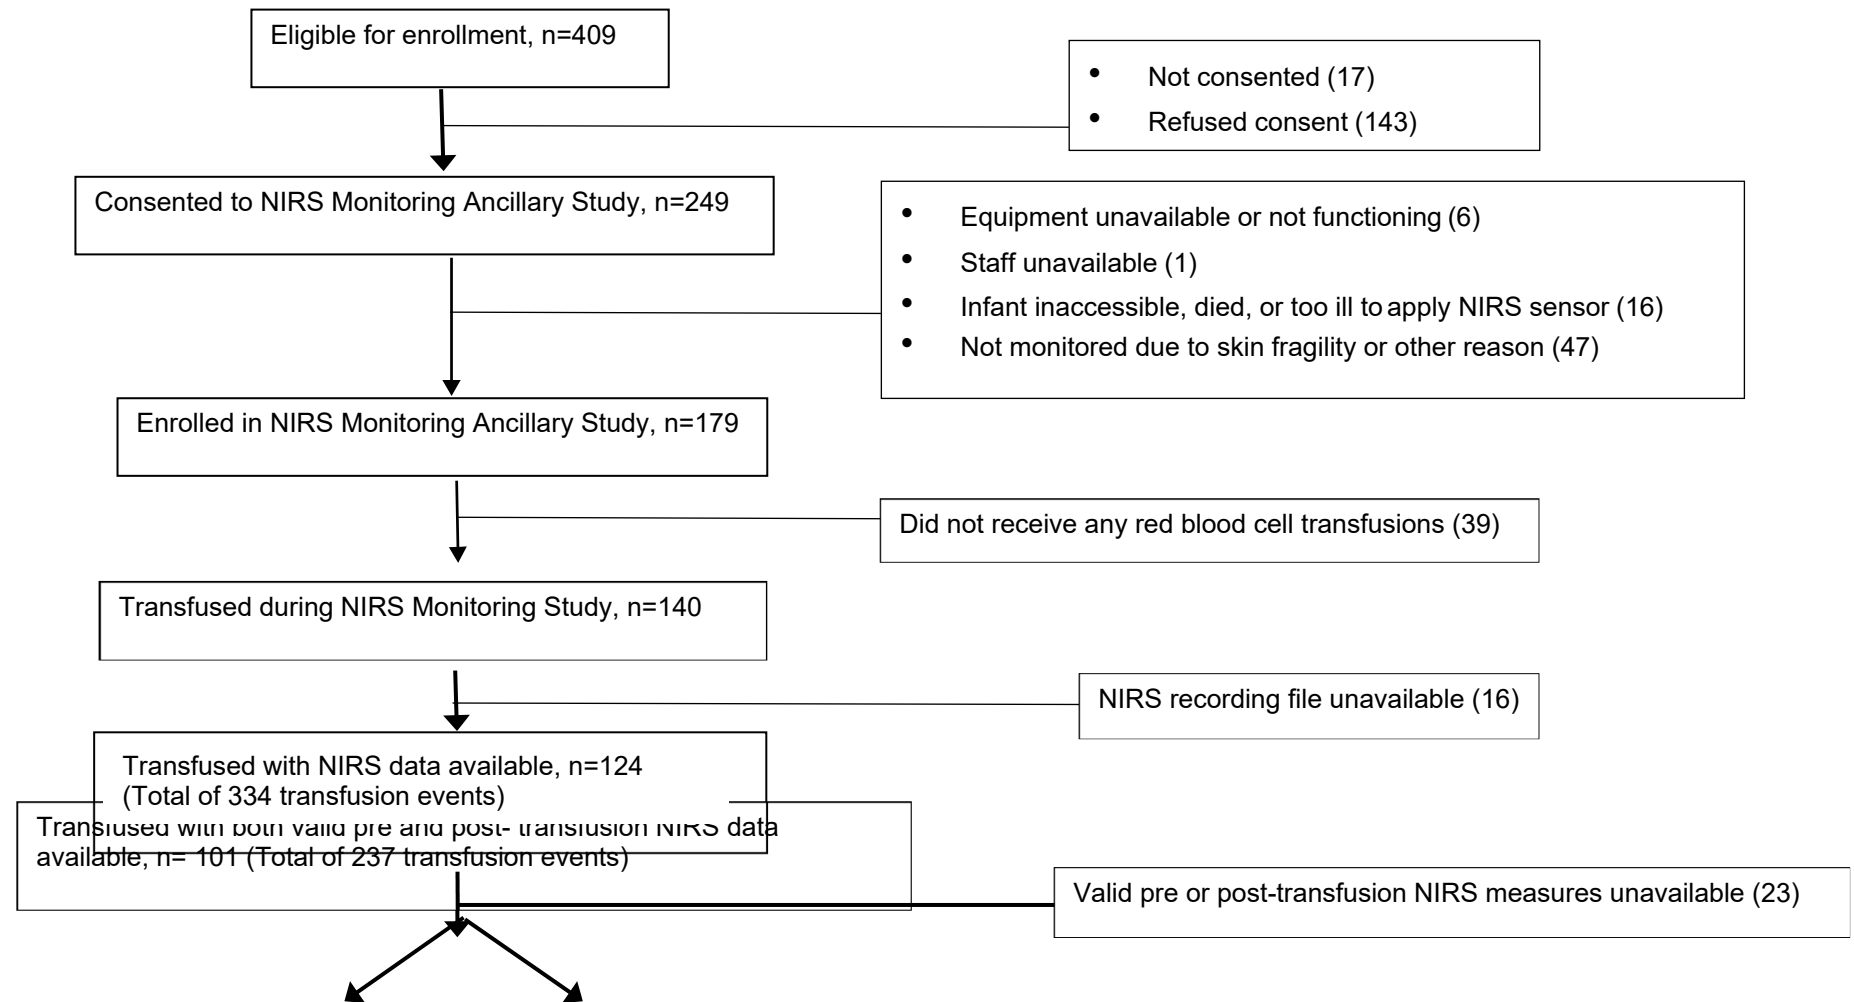

Transfused over the first 28 days  
(primary analysis sample, n=80 with 164  
transfusion events)

Data available for death or NDI  
(secondary analysis sample, n=97)
