# Supplementary material for: Tissue Oxygenation Changes After Transfusion and Outcomes in Preterm Infants: A Secondary Near-Infrared Spectroscopy Study of the Transfusion of Prematures Randomized Clinical Trial (TOP NIRS)
Source: PubMed Central journal article supplement (PMC10514737; doi:10.1001/jamanetworkopen.2023.34889), 2023-09-21
Supplement: jamanetwopen-e2334889-s003.pdf [file jamanetwopen-e2334889-s003.pdf]

\*First name, last name, and suffix (if applicable) are required and will appear in PubMed.

| <b>*Group Name(s): Eunice Kennedy Shriver National Institute of Child Health and Human Development Neonatal Research Network</b> |                   |                              |                         |                                                                                                                                                                                                                       |                                                 |                                                                |                                                                                                   |
|----------------------------------------------------------------------------------------------------------------------------------|-------------------|------------------------------|-------------------------|-----------------------------------------------------------------------------------------------------------------------------------------------------------------------------------------------------------------------|-------------------------------------------------|----------------------------------------------------------------|---------------------------------------------------------------------------------------------------|
| <b>*First Name and Middle Initial(s)</b>                                                                                         | <b>*Last Name</b> | <b>*Suffix (eg, Jr, III)</b> | <b>Academic Degrees</b> | <b>Institution</b>                                                                                                                                                                                                    | <b>Location (city, state/province, country)</b> | <b>Role or Contribution, eg, chair, principal investigator</b> | <b>Group (if more than 1 Group listed in the byline and/or Subgroup (eg, Steering Committee))</b> |
| Sharon L.                                                                                                                        | Wright            |                              | MT (ASCP)               | McGovern Medical School at The University of Texas Health Science Center at Houston, Children's Memorial Hermann Hospital, and Memorial Hermann Southwest Hospital                                                    | Houston, TX                                     | Non-Author Contributor                                         |                                                                                                   |
| Robin S.                                                                                                                         | Roberts           |                              | Btech<br>Mtech          | McMaster University                                                                                                                                                                                                   | Hamilton, Ontario, Canada                       | Non-Author Contributor                                         |                                                                                                   |
| Traci H.                                                                                                                         | Mondoro           |                              | PhD                     | National Heart, Lung, and Blood Institute                                                                                                                                                                             | Bethesda, MD                                    | Non-Author Contributor                                         |                                                                                                   |
| Catherine                                                                                                                        | Levy              |                              | MHA BSN<br>RN           | National Heart, Lung, and Blood Institute                                                                                                                                                                             | Bethesda, MD                                    | Non-Author Contributor                                         |                                                                                                   |
| Leif D.                                                                                                                          | Nelin             |                              | MD                      | Nationwide Children's Hospital, Abigail Wexner Research Institute at Nationwide Children's Hospital, Center for Perinatal Research, The Ohio State University Wexner Medical Center, and Riverside Methodist Hospital | Columbus, OH                                    | Non-Author Contributor                                         |                                                                                                   |
| Nathalie L.                                                                                                                      | Maitre            |                              | MD PhD                  | Nationwide Children's Hospital, Abigail Wexner Research Institute at Nationwide Children's Hospital, Center for Perinatal Research, The Ohio State University Wexner Medical Center, and Riverside Methodist Hospital | Columbus, OH                                    | Non-Author Contributor                                         |                                                                                                   |

Supplemental Online Content: Nonauthor Collaborators

\*First name, last name, and suffix (if applicable) are required and will appear in PubMed.

| *First Name and Middle Initial(s) | *Last Name | *Suffix (eg, Jr, III) | Academic Degrees | Institution                                                                                                                                                                                                           | Location (city, state/province, country) | Role or Contribution, eg, chair, principal investigator | Group (if more than 1 Group listed in the byline) and/or Subgroup (eg, Steering Committee) |
|-----------------------------------|------------|-----------------------|------------------|-----------------------------------------------------------------------------------------------------------------------------------------------------------------------------------------------------------------------|------------------------------------------|---------------------------------------------------------|--------------------------------------------------------------------------------------------|
| Sudarshan R.                      | Jadcherla  |                       | MD               | Nationwide Children’s Hospital, Abigail Wexner Research Institute at Nationwide Children’s Hospital, Center for Perinatal Research, The Ohio State University Wexner Medical Center, and Riverside Methodist Hospital | Columbus, OH                             | Non-Author Contributor                                  |                                                                                            |
| Patricia                          | Luzader    |                       | RN               | Nationwide Children’s Hospital, Abigail Wexner Research Institute at Nationwide Children’s Hospital, Center for Perinatal Research, The Ohio State University Wexner Medical Center, and Riverside Methodist Hospital | Columbus, OH                             | Non-Author Contributor                                  |                                                                                            |
| Christine A.                      | Fortney    |                       | PhD RN           | Nationwide Children’s Hospital, Abigail Wexner Research Institute at Nationwide Children’s Hospital, Center for Perinatal Research, The Ohio State University Wexner Medical Center, and Riverside Methodist Hospital | Columbus, OH                             | Non-Author Contributor                                  |                                                                                            |
| Julie                             | Gutentag   |                       | RN BSN           | Nationwide Children’s Hospital, Abigail Wexner Research Institute at Nationwide Children’s Hospital, Center for Perinatal Research, The Ohio State University Wexner Medical Center, and Riverside Methodist Hospital | Columbus, OH                             | Non-Author Contributor                                  |                                                                                            |

Supplemental Online Content: Nonauthor Collaborators

\*First name, last name, and suffix (if applicable) are required and will appear in PubMed.

| *First Name and Middle Initial(s) | *Last Name     | *Suffix (eg, Jr, III) | Academic Degrees | Institution                                                                                                                                                                                                           | Location (city, state/province, country) | Role or Contribution, eg, chair, principal investigator | Group (if more than 1 Group listed in the byline) and/or Subgroup (eg, Steering Committee) |
|-----------------------------------|----------------|-----------------------|------------------|-----------------------------------------------------------------------------------------------------------------------------------------------------------------------------------------------------------------------|------------------------------------------|---------------------------------------------------------|--------------------------------------------------------------------------------------------|
| Christopher J.                    | Timan          |                       | MD               | Nationwide Children’s Hospital, Abigail Wexner Research Institute at Nationwide Children’s Hospital, Center for Perinatal Research, The Ohio State University Wexner Medical Center, and Riverside Methodist Hospital | Columbus, OH                             | Non-Author Contributor                                  |                                                                                            |
| Kristi                            | Small          |                       | BS               | Nationwide Children’s Hospital, Abigail Wexner Research Institute at Nationwide Children’s Hospital, Center for Perinatal Research, The Ohio State University Wexner Medical Center, and Riverside Methodist Hospital | Columbus, OH                             | Non-Author Contributor                                  |                                                                                            |
| Rox Ann                           | Sullivan       |                       | RN BSN           | Nationwide Children’s Hospital, Abigail Wexner Research Institute at Nationwide Children’s Hospital, Center for Perinatal Research, The Ohio State University Wexner Medical Center, and Riverside Methodist Hospital | Columbus, OH                             | Non-Author Contributor                                  |                                                                                            |
| Lina                              | Yoseff-Salameh |                       | MD               | Nationwide Children’s Hospital, Abigail Wexner Research Institute at Nationwide Children’s Hospital, Center for Perinatal Research, The Ohio State University Wexner Medical Center, and Riverside Methodist Hospital | Columbus, OH                             | Non-Author Contributor                                  |                                                                                            |

## Supplemental Online Content: Nonauthor Collaborators

\*First name, last name, and suffix (if applicable) are required and will appear in PubMed.

| *First Name and Middle Initial(s) | *Last Name | *Suffix (eg, Jr, III) | Academic Degrees | Institution                                                                                                                                                                                                           | Location (city, state/province, country) | Role or Contribution, eg, chair, principal investigator | Group (if more than 1 Group listed in the byline) and/or Subgroup (eg, Steering Committee) |
|-----------------------------------|------------|-----------------------|------------------|-----------------------------------------------------------------------------------------------------------------------------------------------------------------------------------------------------------------------|------------------------------------------|---------------------------------------------------------|--------------------------------------------------------------------------------------------|
| Jacqueline                        | McCool     |                       |                  | Nationwide Children's Hospital, Abigail Wexner Research Institute at Nationwide Children's Hospital, Center for Perinatal Research, The Ohio State University Wexner Medical Center, and Riverside Methodist Hospital | Columbus, OH                             | Non-Author Contributor                                  |                                                                                            |
| Melanie                           | Stein      |                       | RRT BBA          | Nationwide Children's Hospital, Abigail Wexner Research Institute at Nationwide Children's Hospital, Center for Perinatal Research, The Ohio State University Wexner Medical Center, and Riverside Methodist Hospital | Columbus, OH                             | Non-Author Contributor                                  |                                                                                            |
| Erin                              | Fearns     |                       |                  | Nationwide Children's Hospital, Abigail Wexner Research Institute at Nationwide Children's Hospital, Center for Perinatal Research, The Ohio State University Wexner Medical Center, and Riverside Methodist Hospital | Columbus, OH                             | Non-Author Contributor                                  |                                                                                            |
| Aubrey                            | Fowler     |                       | BS               | Nationwide Children's Hospital, Abigail Wexner Research Institute at Nationwide Children's Hospital, Center for Perinatal Research, The Ohio State University Wexner Medical Center, and Riverside Methodist Hospital | Columbus, OH                             | Non-Author Contributor                                  |                                                                                            |

Supplemental Online Content: Nonauthor Collaborators

\*First name, last name, and suffix (if applicable) are required and will appear in PubMed.

| *First Name and Middle Initial(s) | *Last Name | *Suffix (eg, Jr, III) | Academic Degrees | Institution                                                                                                                                                                                                           | Location (city, state/province, country) | Role or Contribution, eg, chair, principal investigator | Group (if more than 1 Group listed in the byline) and/or Subgroup (eg, Steering Committee) |
|-----------------------------------|------------|-----------------------|------------------|-----------------------------------------------------------------------------------------------------------------------------------------------------------------------------------------------------------------------|------------------------------------------|---------------------------------------------------------|--------------------------------------------------------------------------------------------|
| Jennifer                          | Grothouse  |                       | RN BSN           | Nationwide Children’s Hospital, Abigail Wexner Research Institute at Nationwide Children’s Hospital, Center for Perinatal Research, The Ohio State University Wexner Medical Center, and Riverside Methodist Hospital | Columbus, OH                             | Non-Author Contributor                                  |                                                                                            |
| Stephanie                         | Burkhardt  |                       | BS MPH           | Nationwide Children’s Hospital, Abigail Wexner Research Institute at Nationwide Children’s Hospital, Center for Perinatal Research, The Ohio State University Wexner Medical Center, and Riverside Methodist Hospital | Columbus, OH                             | Non-Author Contributor                                  |                                                                                            |
| Jessica                           | Purnell    |                       | BS CCRC          | Nationwide Children’s Hospital, Abigail Wexner Research Institute at Nationwide Children’s Hospital, Center for Perinatal Research, The Ohio State University Wexner Medical Center, and Riverside Methodist Hospital | Columbus, OH                             | Non-Author Contributor                                  |                                                                                            |
| Mary Ann                          | Nelin      |                       | MD               | Nationwide Children’s Hospital, Abigail Wexner Research Institute at Nationwide Children’s Hospital, Center for Perinatal Research, The Ohio State University Wexner Medical Center, and Riverside Methodist Hospital | Columbus, OH                             | Non-Author Contributor                                  |                                                                                            |

Supplemental Online Content: Nonauthor Collaborators

\*First name, last name, and suffix (if applicable) are required and will appear in PubMed.

| *First Name and Middle Initial(s) | *Last Name    | *Suffix (eg, Jr, III) | Academic Degrees | Institution                                                                                                                                                                                                           | Location (city, state/province, country) | Role or Contribution, eg, chair, principal investigator | Group (if more than 1 Group listed in the byline) and/or Subgroup (eg, Steering Committee) |
|-----------------------------------|---------------|-----------------------|------------------|-----------------------------------------------------------------------------------------------------------------------------------------------------------------------------------------------------------------------|------------------------------------------|---------------------------------------------------------|--------------------------------------------------------------------------------------------|
| Helen                             | Carey         |                       | PT DHSc<br>PCS   | Nationwide Children’s Hospital, Abigail Wexner Research Institute at Nationwide Children’s Hospital, Center for Perinatal Research, The Ohio State University Wexner Medical Center, and Riverside Methodist Hospital | Columbus, OH                             | Non-Author Contributor                                  |                                                                                            |
| Lindsay                           | Pietruszewski |                       | PT DPT           | Nationwide Children’s Hospital, Abigail Wexner Research Institute at Nationwide Children’s Hospital, Center for Perinatal Research, The Ohio State University Wexner Medical Center, and Riverside Methodist Hospital | Columbus, OH                             | Non-Author Contributor                                  |                                                                                            |
| Margaret                          | Sullivan      |                       | BS               | Nationwide Children’s Hospital, Abigail Wexner Research Institute at Nationwide Children’s Hospital, Center for Perinatal Research, The Ohio State University Wexner Medical Center, and Riverside Methodist Hospital | Columbus, OH                             | Non-Author Contributor                                  |                                                                                            |
| Julie                             | Shadd         |                       | BS RD LD         | Nationwide Children’s Hospital, Abigail Wexner Research Institute at Nationwide Children’s Hospital, Center for Perinatal Research, The Ohio State University Wexner Medical Center, and Riverside Methodist Hospital | Columbus, OH                             | Non-Author Contributor                                  |                                                                                            |

## Supplemental Online Content: Nonauthor Collaborators

\*First name, last name, and suffix (if applicable) are required and will appear in PubMed.

| *First Name and Middle Initial(s) | *Last Name | *Suffix (eg, Jr, III) | Academic Degrees | Institution                                                                                                                                                                                                           | Location (city, state/province, country) | Role or Contribution, eg, chair, principal investigator | Group (if more than 1 Group listed in the byline) and/or Subgroup (eg, Steering Committee) |
|-----------------------------------|------------|-----------------------|------------------|-----------------------------------------------------------------------------------------------------------------------------------------------------------------------------------------------------------------------|------------------------------------------|---------------------------------------------------------|--------------------------------------------------------------------------------------------|
| Jennifer                          | Notestine  |                       | RN               | Nationwide Children's Hospital, Abigail Wexner Research Institute at Nationwide Children's Hospital, Center for Perinatal Research, The Ohio State University Wexner Medical Center, and Riverside Methodist Hospital | Columbus, OH                             | Non-Author Contributor                                  |                                                                                            |
| Cole                              | Hague      |                       | BA MS            | Nationwide Children's Hospital, Abigail Wexner Research Institute at Nationwide Children's Hospital, Center for Perinatal Research, The Ohio State University Wexner Medical Center, and Riverside Methodist Hospital | Columbus, OH                             | Non-Author Contributor                                  |                                                                                            |
| Erna                              | Clark      |                       | BA               | Nationwide Children's Hospital, Abigail Wexner Research Institute at Nationwide Children's Hospital, Center for Perinatal Research, The Ohio State University Wexner Medical Center, and Riverside Methodist Hospital | Columbus, OH                             | Non-Author Contributor                                  |                                                                                            |
| Michelle                          | Chan       |                       | BS               | Nationwide Children's Hospital, Abigail Wexner Research Institute at Nationwide Children's Hospital, Center for Perinatal Research, The Ohio State University Wexner Medical Center, and Riverside Methodist Hospital | Columbus, OH                             | Non-Author Contributor                                  |                                                                                            |

Supplemental Online Content: Nonauthor Collaborators

\*First name, last name, and suffix (if applicable) are required and will appear in PubMed.

| *First Name and Middle Initial(s) | *Last Name | *Suffix (eg, Jr, III) | Academic Degrees | Institution                                                                                                                                                                                                           | Location (city, state/province, country) | Role or Contribution, eg, chair, principal investigator | Group (if more than 1 Group listed in the byline) and/or Subgroup (eg, Steering Committee) |
|-----------------------------------|------------|-----------------------|------------------|-----------------------------------------------------------------------------------------------------------------------------------------------------------------------------------------------------------------------|------------------------------------------|---------------------------------------------------------|--------------------------------------------------------------------------------------------|
| Courtney                          | Park       |                       | RN               | Nationwide Children’s Hospital, Abigail Wexner Research Institute at Nationwide Children’s Hospital, Center for Perinatal Research, The Ohio State University Wexner Medical Center, and Riverside Methodist Hospital | Columbus, OH                             | Non-Author Contributor                                  |                                                                                            |
| Hallie                            | Baughner   |                       | BS MSN           | Nationwide Children’s Hospital, Abigail Wexner Research Institute at Nationwide Children’s Hospital, Center for Perinatal Research, The Ohio State University Wexner Medical Center, and Riverside Methodist Hospital | Columbus, OH                             | Non-Author Contributor                                  |                                                                                            |
| Demi R.                           | Beckford   |                       | MHS              | Nationwide Children’s Hospital, Abigail Wexner Research Institute at Nationwide Children’s Hospital, Center for Perinatal Research, The Ohio State University Wexner Medical Center, and Riverside Methodist Hospital | Columbus, OH                             | Non-Author Contributor                                  |                                                                                            |
| Bethany                           | Miller     |                       | RN BSN           | Nationwide Children’s Hospital, Abigail Wexner Research Institute at Nationwide Children’s Hospital, Center for Perinatal Research, The Ohio State University Wexner Medical Center, and Riverside Methodist Hospital | Columbus, OH                             | Non-Author Contributor                                  |                                                                                            |



## Supplemental Online Content: Nonauthor Collaborators

\*First name, last name, and suffix (if applicable) are required and will appear in PubMed.

| *First Name and Middle Initial(s) | *Last Name      | *Suffix (eg, Jr, III) | Academic Degrees | Institution                                                                                                                                                                                                           | Location (city, state/province, country) | Role or Contribution, eg, chair, principal investigator | Group (if more than 1 Group listed in the byline) and/or Subgroup (eg, Steering Committee) |
|-----------------------------------|-----------------|-----------------------|------------------|-----------------------------------------------------------------------------------------------------------------------------------------------------------------------------------------------------------------------|------------------------------------------|---------------------------------------------------------|--------------------------------------------------------------------------------------------|
| Laura                             | Marzec          |                       | MD               | Nationwide Children's Hospital, Abigail Wexner Research Institute at Nationwide Children's Hospital, Center for Perinatal Research, The Ohio State University Wexner Medical Center, and Riverside Methodist Hospital | Columbus, OH                             | Non-Author Contributor                                  |                                                                                            |
| Kyrstin                           | Warnimont       |                       | BS               | Nationwide Children's Hospital, Abigail Wexner Research Institute at Nationwide Children's Hospital, Center for Perinatal Research, The Ohio State University Wexner Medical Center, and Riverside Methodist Hospital | Columbus, OH                             | Non-Author Contributor                                  |                                                                                            |
| Carla M.                          | Bann            |                       | PhD              | RTI International                                                                                                                                                                                                     | Research Triangle Park, NC               | Non-Author Contributor                                  |                                                                                            |
| Marie G.                          | Gantz           |                       | PhD              | RTI International                                                                                                                                                                                                     | Research Triangle Park, NC               | Non-Author Contributor                                  |                                                                                            |
| Jeanette                          | O'Donnell Auman |                       | BS               | RTI International                                                                                                                                                                                                     | Research Triangle Park, NC               | Non-Author Contributor                                  |                                                                                            |
| Annie                             | Bayard          |                       | BS               | RTI International                                                                                                                                                                                                     | Research Triangle Park, NC               | Non-Author Contributor                                  |                                                                                            |
| Donald J.                         | Brambilla       |                       | PhD              | RTI International                                                                                                                                                                                                     | Research Triangle Park, NC               | Non-Author Contributor                                  |                                                                                            |
| Margaret M.                       | Crawford        |                       | BS CCRP          | RTI International                                                                                                                                                                                                     | Research Triangle Park, NC               | Non-Author Contributor                                  |                                                                                            |
| Jenna                             | Gabrio          |                       | MPH              | RTI International                                                                                                                                                                                                     | Research Triangle Park, NC               | Non-Author Contributor                                  |                                                                                            |
| Jamie E.                          | Newman          |                       | PhD MPH          | RTI International                                                                                                                                                                                                     | Research Triangle Park, NC               | Non-Author Contributor                                  |                                                                                            |

Supplemental Online Content: Nonauthor Collaborators

\*First name, last name, and suffix (if applicable) are required and will appear in PubMed.

| *First Name and Middle Initial(s) | *Last Name     | *Suffix (eg, Jr, III) | Academic Degrees | Institution                                                                     | Location (city, state/province, country)   | Role or Contribution, eg, chair, principal investigator | Group (if more than 1 Group listed in the byline) and/or Subgroup (eg, Steering Committee) |
|-----------------------------------|----------------|-----------------------|------------------|---------------------------------------------------------------------------------|--------------------------------------------|---------------------------------------------------------|--------------------------------------------------------------------------------------------|
| Carolyn M.                        | Petrie Huitema |                       | MS               | RTI International                                                               | Research Triangle Park, NC                 | Non-Author Contributor                                  |                                                                                            |
| David                             | Leblond        |                       | BS               | RTI International                                                               | Research Triangle Park, NC                 | Non-Author Contributor                                  |                                                                                            |
| Dennis                            | Wallace        |                       | PhD              | RTI International                                                               | Research Triangle Park, NC                 | Non-Author Contributor                                  |                                                                                            |
| Kristin M.                        | Zaterka-Baxter |                       | RN BSN           | RTI International                                                               | Research Triangle Park, NC                 | Non-Author Contributor                                  |                                                                                            |
| David K.                          | Stevenson      |                       | MD               | Stanford University, El Camino Hospital, and Lucile Packard Children's Hospital | Stanford, Mountain View, and Palo Alto, CA | Non-Author Contributor                                  |                                                                                            |
| Barbara                           | Bentley        |                       | PsychD<br>MSEd   | Stanford University, El Camino Hospital, and Lucile Packard Children's Hospital | Stanford, Mountain View, and Palo Alto, CA | Non-Author Contributor                                  |                                                                                            |
| Maria Elena                       | DeAnda         |                       | PhD              | Stanford University, El Camino Hospital, and Lucile Packard Children's Hospital | Stanford, Mountain View, and Palo Alto, CA | Non-Author Contributor                                  |                                                                                            |
| Anne M.                           | DeBattista     |                       | RN PNNP<br>PhD   | Stanford University, El Camino Hospital, and Lucile Packard Children's Hospital | Stanford, Mountain View, and Palo Alto, CA | Non-Author Contributor                                  |                                                                                            |
| Beth                              | Earhart        |                       | PhD              | Stanford University, El Camino Hospital, and Lucile Packard Children's Hospital | Stanford, Mountain View, and Palo Alto, CA | Non-Author Contributor                                  |                                                                                            |
| Lynne C.                          | Huffman        |                       | MD               | Stanford University, El Camino Hospital, and Lucile Packard Children's Hospital | Stanford, Mountain View, and Palo Alto, CA | Non-Author Contributor                                  |                                                                                            |
| Casey E.                          | Kruger         |                       | PhD              | Stanford University, El Camino Hospital, and Lucile Packard Children's Hospital | Stanford, Mountain View, and Palo Alto, CA | Non-Author Contributor                                  |                                                                                            |

## Supplemental Online Content: Nonauthor Collaborators

\*First name, last name, and suffix (if applicable) are required and will appear in PubMed.

| *First Name and Middle Initial(s) | *Last Name       | *Suffix (eg, Jr, III) | Academic Degrees | Institution                                                                          | Location (city, state/province, country)   | Role or Contribution, eg, chair, principal investigator | Group (if more than 1 Group listed in the byline) and/or Subgroup (eg, Steering Committee) |
|-----------------------------------|------------------|-----------------------|------------------|--------------------------------------------------------------------------------------|--------------------------------------------|---------------------------------------------------------|--------------------------------------------------------------------------------------------|
| Ryan E.                           | Lucash           |                       | PhD              | Stanford University, El Camino Hospital, and Lucile Packard Children's Hospital      | Stanford, Mountain View, and Palo Alto, CA | Non-Author Contributor                                  |                                                                                            |
| Melinda S.                        | Proud            |                       | RCP              | Stanford University, El Camino Hospital, and Lucile Packard Children's Hospital      | Stanford, Mountain View, and Palo Alto, CA | Non-Author Contributor                                  |                                                                                            |
| Elizabeth N.                      | Reichert         |                       | MA CCRC          | Stanford University, El Camino Hospital, and Lucile Packard Children's Hospital      | Stanford, Mountain View, and Palo Alto, CA | Non-Author Contributor                                  |                                                                                            |
| Dharshi                           | Sivakumar        |                       | MD               | Stanford University, El Camino Hospital, and Lucile Packard Children's Hospital      | Stanford, Mountain View, and Palo Alto, CA | Non-Author Contributor                                  |                                                                                            |
| Heather                           | Taylor           |                       | PhD              | Stanford University, El Camino Hospital, and Lucile Packard Children's Hospital      | Stanford, Mountain View, and Palo Alto, CA | Non-Author Contributor                                  |                                                                                            |
| Hali E.                           | Weiss            |                       | MD               | Stanford University, El Camino Hospital, and Lucile Packard Children's Hospital      | Stanford, Mountain View, and Palo Alto, CA | Non-Author Contributor                                  |                                                                                            |
| Namasivayam                       | Ambalavanan      |                       | MD               | University of Alabama at Birmingham Health System and Children's Hospital of Alabama | Birmingham, AL                             | Non-Author Contributor                                  |                                                                                            |
| Monica V.                         | Collins          |                       | RN BSN<br>MaEd   | University of Alabama at Birmingham Health System and Children's Hospital of Alabama | Birmingham, AL                             | Non-Author Contributor                                  |                                                                                            |
| Shirley S.                        | Cosby            |                       | RN BSN           | University of Alabama at Birmingham Health System and Children's Hospital of Alabama | Birmingham, AL                             | Non-Author Contributor                                  |                                                                                            |
| Myriam                            | Peralta-Carcelen |                       | MD MPH           | University of Alabama at Birmingham Health System and Children's Hospital of Alabama | Birmingham, AL                             | Non-Author Contributor                                  |                                                                                            |

## Supplemental Online Content: Nonauthor Collaborators

\*First name, last name, and suffix (if applicable) are required and will appear in PubMed.

| *First Name and Middle Initial(s) | *Last Name   | *Suffix (eg, Jr, III) | Academic Degrees  | Institution                                                                          | Location (city, state/province, country) | Role or Contribution, eg, chair, principal investigator | Group (if more than 1 Group listed in the byline) and/or Subgroup (eg, Steering Committee) |
|-----------------------------------|--------------|-----------------------|-------------------|--------------------------------------------------------------------------------------|------------------------------------------|---------------------------------------------------------|--------------------------------------------------------------------------------------------|
| Fred J.                           | Biasini      |                       | PhD               | University of Alabama at Birmingham Health System and Children's Hospital of Alabama | Birmingham, AL                           | Non-Author Contributor                                  |                                                                                            |
| Kristen C.                        | Johnston     |                       | MSN<br>CRNP       | University of Alabama at Birmingham Health System and Children's Hospital of Alabama | Birmingham, AL                           | Non-Author Contributor                                  |                                                                                            |
| Mary Beth                         | Moses        |                       | PT MS PCS         | University of Alabama at Birmingham Health System and Children's Hospital of Alabama | Birmingham, AL                           | Non-Author Contributor                                  |                                                                                            |
| Tara E.                           | McNair       |                       | RN BSN            | University of Alabama at Birmingham Health System and Children's Hospital of Alabama | Birmingham, AL                           | Non-Author Contributor                                  |                                                                                            |
| Vivien A.                         | Philips      |                       | RN BSN            | University of Alabama at Birmingham Health System and Children's Hospital of Alabama | Birmingham, AL                           | Non-Author Contributor                                  |                                                                                            |
| Richard V.                        | Rector       |                       | PhD               | University of Alabama at Birmingham Health System and Children's Hospital of Alabama | Birmingham, AL                           | Non-Author Contributor                                  |                                                                                            |
| Sally                             | Whitley      |                       | MA OTR-L<br>FAOTA | University of Alabama at Birmingham Health System and Children's Hospital of Alabama | Birmingham, AL                           | Non-Author Contributor                                  |                                                                                            |
| Kristy A.                         | Domnanovich  |                       | PhD               | University of Alabama at Birmingham Health System and Children's Hospital of Alabama | Birmingham, AL                           | Non-Author Contributor                                  |                                                                                            |
| Sheree                            | York Chapman |                       | PT DPT<br>PCS     | University of Alabama at Birmingham Health System and Children's Hospital of Alabama | Birmingham, AL                           | Non-Author Contributor                                  |                                                                                            |
| Robin K.                          | Whyte        |                       | MB                | Dalhousie University                                                                 | Halifax, Nova Scotia, Canada             | Non-Author Contributor                                  |                                                                                            |
| Tarah T.                          | Colaizy      |                       | MD MPH            | University of Iowa                                                                   | Iowa City, IA                            | Non-Author Contributor                                  |                                                                                            |

## Supplemental Online Content: Nonauthor Collaborators

\*First name, last name, and suffix (if applicable) are required and will appear in PubMed.

| *First Name and Middle Initial(s) | *Last Name          | *Suffix (eg, Jr, III) | Academic Degrees | Institution                                     | Location (city, state/province, country) | Role or Contribution, eg, chair, principal investigator | Group (if more than 1 Group listed in the byline) and/or Subgroup (eg, Steering Committee) |
|-----------------------------------|---------------------|-----------------------|------------------|-------------------------------------------------|------------------------------------------|---------------------------------------------------------|--------------------------------------------------------------------------------------------|
| John A.                           | Widness             |                       | MD               | University of Iowa                              | Iowa City, IA                            | Non-Author Contributor                                  |                                                                                            |
| Jane E.                           | Brumbaugh           |                       | MD               | University of Iowa                              | Iowa City, IA                            | Non-Author Contributor                                  |                                                                                            |
| Heidi M.                          | Harmon              |                       | MD               | University of Iowa                              | Iowa City, IA                            | Non-Author Contributor                                  |                                                                                            |
| Jacky R.                          | Walker              |                       | RN               | University of Iowa                              | Iowa City, IA                            | Non-Author Contributor                                  |                                                                                            |
| Claire A.                         | Goeke               |                       | RN               | University of Iowa                              | Iowa City, IA                            | Non-Author Contributor                                  |                                                                                            |
| Mendi L.                          | Schmelzel           |                       | MSN RN           | University of Iowa                              | Iowa City, IA                            | Non-Author Contributor                                  |                                                                                            |
| Diane L.                          | Eastman             |                       | RN CPNP<br>MA    | University of Iowa                              | Iowa City, IA                            | Non-Author Contributor                                  |                                                                                            |
| Conra                             | Backstrom Lacy      |                       | RN               | University of New Mexico Health Sciences Center | Albuquerque, NM                          | Non-Author Contributor                                  |                                                                                            |
| Janell                            | Fuller              |                       | MD               | University of New Mexico Health Sciences Center | Albuquerque, NM                          | Non-Author Contributor                                  |                                                                                            |
| Mary                              | Hanson              |                       | RN BSN           | University of New Mexico Health Sciences Center | Albuquerque, NM                          | Non-Author Contributor                                  |                                                                                            |
| Carol                             | Hartenberger        |                       | BSN MPH          | University of New Mexico Health Sciences Center | Albuquerque, NM                          | Non-Author Contributor                                  |                                                                                            |
| Elizabeth                         | Kuan                |                       | RN BSN           | University of New Mexico Health Sciences Center | Albuquerque, NM                          | Non-Author Contributor                                  |                                                                                            |
| Jean R.                           | Lowe                |                       | PhD              | University of New Mexico Health Sciences Center | Albuquerque, NM                          | Non-Author Contributor                                  |                                                                                            |
| Sandra                            | Sundquist<br>Beaman |                       | MSN RNC          | University of New Mexico Health Sciences Center | Albuquerque, NM                          | Non-Author Contributor                                  |                                                                                            |

## Supplemental Online Content: Nonauthor Collaborators

\*First name, last name, and suffix (if applicable) are required and will appear in PubMed.

| *First Name and Middle Initial(s) | *Last Name | *Suffix (eg, Jr, III) | Academic Degrees | Institution                                                                                                                            | Location (city, state/province, country) | Role or Contribution, eg, chair, principal investigator | Group (if more than 1 Group listed in the byline) and/or Subgroup (eg, Steering Committee) |
|-----------------------------------|------------|-----------------------|------------------|----------------------------------------------------------------------------------------------------------------------------------------|------------------------------------------|---------------------------------------------------------|--------------------------------------------------------------------------------------------|
| Eric C.                           | Eichenwald |                       | MD               | University of Pennsylvania, Hospital of the University of Pennsylvania, Pennsylvania Hospital, and Children's Hospital of Philadelphia | Philadelphia, PA                         | Non-Author Contributor                                  |                                                                                            |
| Barbara                           | Schmidt    |                       | MD MSc           | University of Pennsylvania, Hospital of the University of Pennsylvania, Pennsylvania Hospital, and Children's Hospital of Philadelphia | Philadelphia, PA                         | Non-Author Contributor                                  |                                                                                            |
| Soraya                            | Abbasi     |                       | MD               | University of Pennsylvania, Hospital of the University of Pennsylvania, Pennsylvania Hospital, and Children's Hospital of Philadelphia | Philadelphia, PA                         | Non-Author Contributor                                  |                                                                                            |
| Aasma S.                          | Chaudhary  |                       | BS RRT           | University of Pennsylvania, Hospital of the University of Pennsylvania, Pennsylvania Hospital, and Children's Hospital of Philadelphia | Philadelphia, PA                         | Non-Author Contributor                                  |                                                                                            |
| Dara M.                           | Cucinotta  |                       | RN               | University of Pennsylvania, Hospital of the University of Pennsylvania, Pennsylvania Hospital, and Children's Hospital of Philadelphia | Philadelphia, PA                         | Non-Author Contributor                                  |                                                                                            |
| Judy C.                           | Bernbaum   |                       | MD               | University of Pennsylvania, Hospital of the University of Pennsylvania, Pennsylvania Hospital, and Children's Hospital of Philadelphia | Philadelphia, PA                         | Non-Author Contributor                                  |                                                                                            |

Supplemental Online Content: Nonauthor Collaborators

\*First name, last name, and suffix (if applicable) are required and will appear in PubMed.

| *First Name and Middle Initial(s) | *Last Name | *Suffix (eg, Jr, III) | Academic Degrees | Institution                                                                                                                                    | Location (city, state/province, country) | Role or Contribution, eg, chair, principal investigator | Group (if more than 1 Group listed in the byline) and/or Subgroup (eg, Steering Committee) |
|-----------------------------------|------------|-----------------------|------------------|------------------------------------------------------------------------------------------------------------------------------------------------|------------------------------------------|---------------------------------------------------------|--------------------------------------------------------------------------------------------|
| Marsha                            | Gerdes     |                       | PhD              | University of Pennsylvania, Hospital of the University of Pennsylvania, Pennsylvania Hospital, and Children's Hospital of Philadelphia         | Philadelphia, PA                         | Non-Author Contributor                                  |                                                                                            |
| Hallam                            | Hurt       |                       | MD               | University of Pennsylvania, Hospital of the University of Pennsylvania, Pennsylvania Hospital, and Children's Hospital of Philadelphia         | Philadelphia, PA                         | Non-Author Contributor                                  |                                                                                            |
| Jonathan                          | Snyder     |                       | RN BSN           | University of Pennsylvania, Hospital of the University of Pennsylvania, Pennsylvania Hospital, and Children's Hospital of Philadelphia         | Philadelphia, PA                         | Non-Author Contributor                                  |                                                                                            |
| Kris                              | Ziolkowski |                       | CMA (AAMA) CCRP  | University of Pennsylvania, Hospital of the University of Pennsylvania, Pennsylvania Hospital, and Children's Hospital of Philadelphia         | Philadelphia, PA                         | Non-Author Contributor                                  |                                                                                            |
| Carl T.                           | D'Angio    |                       | MD               | University of Rochester Medical Center, Golisano Children's Hospital, and the University of Buffalo Women's and Children's Hospital of Buffalo | Rochester and Buffalo, NY                | Non-Author Contributor                                  |                                                                                            |
| Ronnie                            | Guillet    |                       | MD PhD           | University of Rochester Medical Center, Golisano Children's Hospital, and the University of Buffalo Women's and Children's Hospital of Buffalo | Rochester and Buffalo, NY                | Non-Author Contributor                                  |                                                                                            |

Supplemental Online Content: Nonauthor Collaborators

\*First name, last name, and suffix (if applicable) are required and will appear in PubMed.

| *First Name and Middle Initial(s) | *Last Name | *Suffix (eg, Jr, III) | Academic Degrees | Institution                                                                                                                                    | Location (city, state/province, country) | Role or Contribution, eg, chair, principal investigator | Group (if more than 1 Group listed in the byline) and/or Subgroup (eg, Steering Committee) |
|-----------------------------------|------------|-----------------------|------------------|------------------------------------------------------------------------------------------------------------------------------------------------|------------------------------------------|---------------------------------------------------------|--------------------------------------------------------------------------------------------|
| Melissa F.                        | Carmen     |                       | MD               | University of Rochester Medical Center, Golisano Children's Hospital, and the University of Buffalo Women's and Children's Hospital of Buffalo | Rochester and Buffalo, NY                | Non-Author Contributor                                  |                                                                                            |
| Gary J.                           | Myers      |                       | MD               | University of Rochester Medical Center, Golisano Children's Hospital, and the University of Buffalo Women's and Children's Hospital of Buffalo | Rochester and Buffalo, NY                | Non-Author Contributor                                  |                                                                                            |
| Kyle                              | Binion     |                       | BS               | University of Rochester Medical Center, Golisano Children's Hospital, and the University of Buffalo Women's and Children's Hospital of Buffalo | Rochester and Buffalo, NY                | Non-Author Contributor                                  |                                                                                            |
| Melissa                           | Bowman     |                       | RN NP            | University of Rochester Medical Center, Golisano Children's Hospital, and the University of Buffalo Women's and Children's Hospital of Buffalo | Rochester and Buffalo, NY                | Non-Author Contributor                                  |                                                                                            |
| Elizabeth                         | Boylin     |                       | BA               | University of Rochester Medical Center, Golisano Children's Hospital, and the University of Buffalo Women's and Children's Hospital of Buffalo | Rochester and Buffalo, NY                | Non-Author Contributor                                  |                                                                                            |
| Caitlin                           | Fallone    |                       | MA               | University of Rochester Medical Center, Golisano Children's Hospital, and the University of Buffalo Women's and Children's Hospital of Buffalo | Rochester and Buffalo, NY                | Non-Author Contributor                                  |                                                                                            |



## Supplemental Online Content: Nonauthor Collaborators

\*First name, last name, and suffix (if applicable) are required and will appear in PubMed.

| *First Name and Middle Initial(s) | *Last Name | *Suffix (eg, Jr, III) | Academic Degrees | Institution                                                                                                                                    | Location (city, state/province, country) | Role or Contribution, eg, chair, principal investigator | Group (if more than 1 Group listed in the byline) and/or Subgroup (eg, Steering Committee) |
|-----------------------------------|------------|-----------------------|------------------|------------------------------------------------------------------------------------------------------------------------------------------------|------------------------------------------|---------------------------------------------------------|--------------------------------------------------------------------------------------------|
| Osman                             | Farooq     |                       | MD               | University of Rochester Medical Center, Golisano Children's Hospital, and the University of Buffalo Women's and Children's Hospital of Buffalo | Rochester and Buffalo, NY                | Non-Author Contributor                                  |                                                                                            |
| Julianne                          | Hunn       |                       | MSHCM            | University of Rochester Medical Center, Golisano Children's Hospital, and the University of Buffalo Women's and Children's Hospital of Buffalo | Rochester and Buffalo, NY                | Non-Author Contributor                                  |                                                                                            |
| Rosemary L.                       | Jensen     |                       |                  | University of Rochester Medical Center, Golisano Children's Hospital, and the University of Buffalo Women's and Children's Hospital of Buffalo | Rochester and Buffalo, NY                | Non-Author Contributor                                  |                                                                                            |
| Rachel                            | Jones      |                       |                  | University of Rochester Medical Center, Golisano Children's Hospital, and the University of Buffalo Women's and Children's Hospital of Buffalo | Rochester and Buffalo, NY                | Non-Author Contributor                                  |                                                                                            |
| Joan                              | Merzbach   |                       | LMSW             | University of Rochester Medical Center, Golisano Children's Hospital, and the University of Buffalo Women's and Children's Hospital of Buffalo | Rochester and Buffalo, NY                | Non-Author Contributor                                  |                                                                                            |
| Constance                         | Orne       |                       |                  | University of Rochester Medical Center, Golisano Children's Hospital, and the University of Buffalo Women's and Children's Hospital of Buffalo | Rochester and Buffalo, NY                | Non-Author Contributor                                  |                                                                                            |

## Supplemental Online Content: Nonauthor Collaborators

\*First name, last name, and suffix (if applicable) are required and will appear in PubMed.

| *First Name and Middle Initial(s) | *Last Name      | *Suffix (eg, Jr, III) | Academic Degrees | Institution                                                                                                                                    | Location (city, state/province, country) | Role or Contribution, eg, chair, principal investigator | Group (if more than 1 Group listed in the byline) and/or Subgroup (eg, Steering Committee) |
|-----------------------------------|-----------------|-----------------------|------------------|------------------------------------------------------------------------------------------------------------------------------------------------|------------------------------------------|---------------------------------------------------------|--------------------------------------------------------------------------------------------|
| Premini                           | Sabaratnam      |                       | MPH              | University of Rochester Medical Center, Golisano Children's Hospital, and the University of Buffalo Women's and Children's Hospital of Buffalo | Rochester and Buffalo, NY                | Non-Author Contributor                                  |                                                                                            |
| Ann Marie                         | Scorsone        |                       | MS CCRC          | University of Rochester Medical Center, Golisano Children's Hospital, and the University of Buffalo Women's and Children's Hospital of Buffalo | Rochester and Buffalo, NY                | Non-Author Contributor                                  |                                                                                            |
| Holly I.M.                        | Wadkins         |                       |                  | University of Rochester Medical Center, Golisano Children's Hospital, and the University of Buffalo Women's and Children's Hospital of Buffalo | Rochester and Buffalo, NY                | Non-Author Contributor                                  |                                                                                            |
| Kelly                             | Yost            |                       | PhD              | University of Rochester Medical Center, Golisano Children's Hospital, and the University of Buffalo Women's and Children's Hospital of Buffalo | Rochester and Buffalo, NY                | Non-Author Contributor                                  |                                                                                            |
| Satyan                            | Lakshminrusimha |                       | MD               | University of Rochester Medical Center, Golisano Children's Hospital, and the University of Buffalo Women's and Children's Hospital of Buffalo | Rochester and Buffalo, NY                | Non-Author Contributor                                  |                                                                                            |
| Stephanie                         | Guilford        |                       | BS               | University of Rochester Medical Center, Golisano Children's Hospital, and the University of Buffalo Women's and Children's Hospital of Buffalo | Rochester and Buffalo, NY                | Non-Author Contributor                                  |                                                                                            |

## Supplemental Online Content: Nonauthor Collaborators

\*First name, last name, and suffix (if applicable) are required and will appear in PubMed.

| *First Name and Middle Initial(s) | *Last Name        | *Suffix (eg, Jr, III) | Academic Degrees | Institution                                                                                                                                    | Location (city, state/province, country) | Role or Contribution, eg, chair, principal investigator | Group (if more than 1 Group listed in the byline) and/or Subgroup (eg, Steering Committee) |
|-----------------------------------|-------------------|-----------------------|------------------|------------------------------------------------------------------------------------------------------------------------------------------------|------------------------------------------|---------------------------------------------------------|--------------------------------------------------------------------------------------------|
| Michelle E.                       | Hartley-McAndrews |                       | MD               | University of Rochester Medical Center, Golisano Children's Hospital, and the University of Buffalo Women's and Children's Hospital of Buffalo | Rochester and Buffalo, NY                | Non-Author Contributor                                  |                                                                                            |
| Ashley                            | Williams          |                       | MSEd             | University of Rochester Medical Center, Golisano Children's Hospital, and the University of Buffalo Women's and Children's Hospital of Buffalo | Rochester and Buffalo, NY                | Non-Author Contributor                                  |                                                                                            |
| William                           | Zorn              |                       | PhD              | University of Rochester Medical Center, Golisano Children's Hospital, and the University of Buffalo Women's and Children's Hospital of Buffalo | Rochester and Buffalo, NY                | Non-Author Contributor                                  |                                                                                            |
| Emily                             | Li                |                       | BA               | University of Rochester Medical Center, Golisano Children's Hospital, and the University of Buffalo Women's and Children's Hospital of Buffalo | Rochester and Buffalo, NY                | Non-Author Contributor                                  |                                                                                            |
| Jennifer                          | Donato            |                       | BS               | University of Rochester Medical Center, Golisano Children's Hospital, and the University of Buffalo Women's and Children's Hospital of Buffalo | Rochester and Buffalo, NY                | Non-Author Contributor                                  |                                                                                            |
| Kimberly G.                       | McKee             |                       | BS               | University of Rochester Medical Center, Golisano Children's Hospital, and the University of Buffalo Women's and Children's Hospital of Buffalo | Rochester and Buffalo, NY                | Non-Author Contributor                                  |                                                                                            |

## Supplemental Online Content: Nonauthor Collaborators

\*First name, last name, and suffix (if applicable) are required and will appear in PubMed.

| *First Name and Middle Initial(s) | *Last Name | *Suffix (eg, Jr, III) | Academic Degrees   | Institution                                                                                                                                    | Location (city, state/province, country) | Role or Contribution, eg, chair, principal investigator | Group (if more than 1 Group listed in the byline) and/or Subgroup (eg, Steering Committee) |
|-----------------------------------|------------|-----------------------|--------------------|------------------------------------------------------------------------------------------------------------------------------------------------|------------------------------------------|---------------------------------------------------------|--------------------------------------------------------------------------------------------|
| Kelly R.                          | Coleman    |                       | PsyD               | University of Rochester Medical Center, Golisano Children's Hospital, and the University of Buffalo Women's and Children's Hospital of Buffalo | Rochester and Buffalo, NY                | Non-Author Contributor                                  |                                                                                            |
| Alison                            | Kent       |                       | BMBS<br>FRACP MD   | University of Rochester Medical Center, Golisano Children's Hospital, and the University of Buffalo Women's and Children's Hospital of Buffalo | Rochester and Buffalo, NY                | Non-Author Contributor                                  |                                                                                            |
| Luc P.                            | Brion      |                       | MD                 | University of Texas Southwestern Medical Center, Parkland Health & Hospital System, and Children's Medical Center Dallas                       | Dallas, TX                               | Non-Author Contributor                                  |                                                                                            |
| Roy J.                            | Heyne      |                       | MD                 | University of Texas Southwestern Medical Center, Parkland Health & Hospital System, and Children's Medical Center Dallas                       | Dallas, TX                               | Non-Author Contributor                                  |                                                                                            |
| Diana M.                          | Vasil      |                       | MSN BSN<br>RNC-NIC | University of Texas Southwestern Medical Center, Parkland Health & Hospital System, and Children's Medical Center Dallas                       | Dallas, TX                               | Non-Author Contributor                                  |                                                                                            |
| Sally S.                          | Adams      |                       | MS RN<br>CPNP      | University of Texas Southwestern Medical Center, Parkland Health & Hospital System, and Children's Medical Center Dallas                       | Dallas, TX                               | Non-Author Contributor                                  |                                                                                            |
| Maria M.                          | De Leon    |                       | RN                 | University of Texas Southwestern Medical Center, Parkland Health & Hospital System, and Children's Medical Center Dallas                       | Dallas, TX                               | Non-Author Contributor                                  |                                                                                            |

## Supplemental Online Content: Nonauthor Collaborators

\*First name, last name, and suffix (if applicable) are required and will appear in PubMed.

| *First Name and Middle Initial(s) | *Last Name | *Suffix (eg, Jr, III) | Academic Degrees              | Institution                                                                                                              | Location (city, state/province, country) | Role or Contribution, eg, chair, principal investigator | Group (if more than 1 Group listed in the byline) and/or Subgroup (eg, Steering Committee) |
|-----------------------------------|------------|-----------------------|-------------------------------|--------------------------------------------------------------------------------------------------------------------------|------------------------------------------|---------------------------------------------------------|--------------------------------------------------------------------------------------------|
| Francis                           | Eubanks    |                       | RN BSN                        | University of Texas Southwestern Medical Center, Parkland Health & Hospital System, and Children's Medical Center Dallas | Dallas, TX                               | Non-Author Contributor                                  |                                                                                            |
| Alicia                            | Guzman     |                       |                               | University of Texas Southwestern Medical Center, Parkland Health & Hospital System, and Children's Medical Center Dallas | Dallas, TX                               | Non-Author Contributor                                  |                                                                                            |
| Elizabeth                         | Heyne      |                       | PsyD PA-C                     | University of Texas Southwestern Medical Center, Parkland Health & Hospital System, and Children's Medical Center Dallas | Dallas, TX                               | Non-Author Contributor                                  |                                                                                            |
| Lizette E.                        | Lee        |                       | RN                            | University of Texas Southwestern Medical Center, Parkland Health & Hospital System, and Children's Medical Center Dallas | Dallas, TX                               | Non-Author Contributor                                  |                                                                                            |
| Linda A.                          | Madden     |                       | BSN RN<br>CPNP                | University of Texas Southwestern Medical Center, Parkland Health & Hospital System, and Children's Medical Center Dallas | Dallas, TX                               | Non-Author Contributor                                  |                                                                                            |
| E. Rebecca                        | McDougald  |                       | MSN<br>APRN<br>CPNP-<br>PC/AC | University of Texas Southwestern Medical Center, Parkland Health & Hospital System, and Children's Medical Center Dallas | Dallas, TX                               | Non-Author Contributor                                  |                                                                                            |
| Lara                              | Pavageau   |                       | MD                            | University of Texas Southwestern Medical Center, Parkland Health & Hospital System, and Children's Medical Center Dallas | Dallas, TX                               | Non-Author Contributor                                  |                                                                                            |

Supplemental Online Content: Nonauthor Collaborators

\*First name, last name, and suffix (if applicable) are required and will appear in PubMed.

| *First Name and Middle Initial(s) | *Last Name      | *Suffix (eg, Jr, III) | Academic Degrees  | Institution                                                                                                                                | Location (city, state/province, country)     | Role or Contribution, eg, chair, principal investigator | Group (if more than 1 Group listed in the byline) and/or Subgroup (eg, Steering Committee) |
|-----------------------------------|-----------------|-----------------------|-------------------|--------------------------------------------------------------------------------------------------------------------------------------------|----------------------------------------------|---------------------------------------------------------|--------------------------------------------------------------------------------------------|
| Pollianna                         | Sepulveda       |                       | RN                | University of Texas Southwestern Medical Center, Parkland Health & Hospital System, and Children's Medical Center Dallas                   | Dallas, TX                                   | Non-Author Contributor                                  |                                                                                            |
| Cathy                             | Twell Boatman   |                       | MS CIMI           | University of Texas Southwestern Medical Center, Parkland Health & Hospital System, and Children's Medical Center Dallas                   | Dallas, TX                                   | Non-Author Contributor                                  |                                                                                            |
| Kristine                          | Tolentino-Plata |                       | MS                | University of Texas Southwestern Medical Center, Parkland Health & Hospital System, and Children's Medical Center Dallas                   | Dallas, TX                                   | Non-Author Contributor                                  |                                                                                            |
| Azucena                           | Vera            |                       | AS                | University of Texas Southwestern Medical Center, Parkland Health & Hospital System, and Children's Medical Center Dallas                   | Dallas, TX                                   | Non-Author Contributor                                  |                                                                                            |
| Jillian                           | Waterbury       |                       | DNP RN<br>CPNP-PC | University of Texas Southwestern Medical Center, Parkland Health & Hospital System, and Children's Medical Center Dallas                   | Dallas, TX                                   | Non-Author Contributor                                  |                                                                                            |
| Bradley A.                        | Yoder           |                       | MD                | University of Utah Medical Center, Intermountain Medical Center, McKay-Dee Hospital, Utah Valley Hospital, and Primary Children's Hospital | Murray, Ogden, Provo, and Salt Lake City, UT | Non-Author Contributor                                  |                                                                                            |
| Stephen. D.                       | Minton          |                       | MD                | University of Utah Medical Center, Intermountain Medical Center, McKay-Dee Hospital, Utah Valley Hospital, and Primary Children's Hospital | Murray, Ogden, Provo, and Salt Lake City, UT | Non-Author Contributor                                  |                                                                                            |

## Supplemental Online Content: Nonauthor Collaborators

\*First name, last name, and suffix (if applicable) are required and will appear in PubMed.

| *First Name and Middle Initial(s) | *Last Name  | *Suffix (eg, Jr, III) | Academic Degrees | Institution                                                                                                                                | Location (city, state/province, country)     | Role or Contribution, eg, chair, principal investigator | Group (if more than 1 Group listed in the byline) and/or Subgroup (eg, Steering Committee) |
|-----------------------------------|-------------|-----------------------|------------------|--------------------------------------------------------------------------------------------------------------------------------------------|----------------------------------------------|---------------------------------------------------------|--------------------------------------------------------------------------------------------|
| Mark J.                           | Sheffield   |                       | MD               | University of Utah Medical Center, Intermountain Medical Center, McKay-Dee Hospital, Utah Valley Hospital, and Primary Children's Hospital | Murray, Ogden, Provo, and Salt Lake City, UT | Non-Author Contributor                                  |                                                                                            |
| Carrie A.                         | Rau         |                       | RN BSN<br>CCRC   | University of Utah Medical Center, Intermountain Medical Center, McKay-Dee Hospital, Utah Valley Hospital, and Primary Children's Hospital | Murray, Ogden, Provo, and Salt Lake City, UT | Non-Author Contributor                                  |                                                                                            |
| Sarah                             | Winter      |                       | MD               | University of Utah Medical Center, Intermountain Medical Center, McKay-Dee Hospital, Utah Valley Hospital, and Primary Children's Hospital | Murray, Ogden, Provo, and Salt Lake City, UT | Non-Author Contributor                                  |                                                                                            |
| Shawna                            | Baker       |                       | RN               | University of Utah Medical Center, Intermountain Medical Center, McKay-Dee Hospital, Utah Valley Hospital, and Primary Children's Hospital | Murray, Ogden, Provo, and Salt Lake City, UT | Non-Author Contributor                                  |                                                                                            |
| Jill                              | Burnett     |                       | RN BSN           | University of Utah Medical Center, Intermountain Medical Center, McKay-Dee Hospital, Utah Valley Hospital, and Primary Children's Hospital | Murray, Ogden, Provo, and Salt Lake City, UT | Non-Author Contributor                                  |                                                                                            |
| Susan                             | Christensen |                       | RN               | University of Utah Medical Center, Intermountain Medical Center, McKay-Dee Hospital, Utah Valley Hospital, and Primary Children's Hospital | Murray, Ogden, Provo, and Salt Lake City, UT | Non-Author Contributor                                  |                                                                                            |

## Supplemental Online Content: Nonauthor Collaborators

\*First name, last name, and suffix (if applicable) are required and will appear in PubMed.

| *First Name and Middle Initial(s) | *Last Name   | *Suffix (eg, Jr, III) | Academic Degrees | Institution                                                                                                                                | Location (city, state/province, country)     | Role or Contribution, eg, chair, principal investigator | Group (if more than 1 Group listed in the byline) and/or Subgroup (eg, Steering Committee) |
|-----------------------------------|--------------|-----------------------|------------------|--------------------------------------------------------------------------------------------------------------------------------------------|----------------------------------------------|---------------------------------------------------------|--------------------------------------------------------------------------------------------|
| Laura                             | Cole Bledsoe |                       | RN               | University of Utah Medical Center, Intermountain Medical Center, McKay-Dee Hospital, Utah Valley Hospital, and Primary Children's Hospital | Murray, Ogden, Provo, and Salt Lake City, UT | Non-Author Contributor                                  |                                                                                            |
| Sean                              | Cunningham   |                       | PhD              | University of Utah Medical Center, Intermountain Medical Center, McKay-Dee Hospital, Utah Valley Hospital, and Primary Children's Hospital | Murray, Ogden, Provo, and Salt Lake City, UT | Non-Author Contributor                                  |                                                                                            |
| Jennifer O.                       | Elmont       |                       | RN BSN           | University of Utah Medical Center, Intermountain Medical Center, McKay-Dee Hospital, Utah Valley Hospital, and Primary Children's Hospital | Murray, Ogden, Provo, and Salt Lake City, UT | Non-Author Contributor                                  |                                                                                            |
| Becky                             | Hall         |                       | APRN             | University of Utah Medical Center, Intermountain Medical Center, McKay-Dee Hospital, Utah Valley Hospital, and Primary Children's Hospital | Murray, Ogden, Provo, and Salt Lake City, UT | Non-Author Contributor                                  |                                                                                            |
| Trisha                            | Marshant     |                       | RN               | University of Utah Medical Center, Intermountain Medical Center, McKay-Dee Hospital, Utah Valley Hospital, and Primary Children's Hospital | Murray, Ogden, Provo, and Salt Lake City, UT | Non-Author Contributor                                  |                                                                                            |
| Earl                              | Maxson       |                       | RN CCRN          | University of Utah Medical Center, Intermountain Medical Center, McKay-Dee Hospital, Utah Valley Hospital, and Primary Children's Hospital | Murray, Ogden, Provo, and Salt Lake City, UT | Non-Author Contributor                                  |                                                                                            |



Supplemental Online Content: Nonauthor Collaborators

\*First name, last name, and suffix (if applicable) are required and will appear in PubMed.

| *First Name and Middle Initial(s) | *Last Name   | *Suffix (eg, Jr, III) | Academic Degrees | Institution                                                                                                                                | Location (city, state/province, country)     | Role or Contribution, eg, chair, principal investigator | Group (if more than 1 Group listed in the byline) and/or Subgroup (eg, Steering Committee) |
|-----------------------------------|--------------|-----------------------|------------------|--------------------------------------------------------------------------------------------------------------------------------------------|----------------------------------------------|---------------------------------------------------------|--------------------------------------------------------------------------------------------|
| Kandace M.                        | McGrath      |                       |                  | University of Utah Medical Center, Intermountain Medical Center, McKay-Dee Hospital, Utah Valley Hospital, and Primary Children's Hospital | Murray, Ogden, Provo, and Salt Lake City, UT | Non-Author Contributor                                  |                                                                                            |
| Hena G.                           | Mickelsen    |                       | BA               | University of Utah Medical Center, Intermountain Medical Center, McKay-Dee Hospital, Utah Valley Hospital, and Primary Children's Hospital | Murray, Ogden, Provo, and Salt Lake City, UT | Non-Author Contributor                                  |                                                                                            |
| Galina                            | Morshedzadeh |                       | BSN APRN         | University of Utah Medical Center, Intermountain Medical Center, McKay-Dee Hospital, Utah Valley Hospital, and Primary Children's Hospital | Murray, Ogden, Provo, and Salt Lake City, UT | Non-Author Contributor                                  |                                                                                            |
| D. Melody                         | Parry        |                       | RN BSN           | University of Utah Medical Center, Intermountain Medical Center, McKay-Dee Hospital, Utah Valley Hospital, and Primary Children's Hospital | Murray, Ogden, Provo, and Salt Lake City, UT | Non-Author Contributor                                  |                                                                                            |
| Brixen A.                         | Reich        |                       | MSN RNC CCRC     | University of Utah Medical Center, Intermountain Medical Center, McKay-Dee Hospital, Utah Valley Hospital, and Primary Children's Hospital | Murray, Ogden, Provo, and Salt Lake City, UT | Non-Author Contributor                                  |                                                                                            |
| Susan T.                          | Schaefer     |                       | RN BSN RRT       | University of Utah Medical Center, Intermountain Medical Center, McKay-Dee Hospital, Utah Valley Hospital, and Primary Children's Hospital | Murray, Ogden, Provo, and Salt Lake City, UT | Non-Author Contributor                                  |                                                                                            |

## Supplemental Online Content: Nonauthor Collaborators

\*First name, last name, and suffix (if applicable) are required and will appear in PubMed.

| *First Name and Middle Initial(s) | *Last Name   | *Suffix (eg, Jr, III) | Academic Degrees | Institution                                                                                                                                | Location (city, state/province, country)     | Role or Contribution, eg, chair, principal investigator | Group (if more than 1 Group listed in the byline) and/or Subgroup (eg, Steering Committee) |
|-----------------------------------|--------------|-----------------------|------------------|--------------------------------------------------------------------------------------------------------------------------------------------|----------------------------------------------|---------------------------------------------------------|--------------------------------------------------------------------------------------------|
| Ashley L.                         | Stuart       |                       | PhD              | University of Utah Medical Center, Intermountain Medical Center, McKay-Dee Hospital, Utah Valley Hospital, and Primary Children's Hospital | Murray, Ogden, Provo, and Salt Lake City, UT | Non-Author Contributor                                  |                                                                                            |
| Kelly                             | Stout        |                       | PhD              | University of Utah Medical Center, Intermountain Medical Center, McKay-Dee Hospital, Utah Valley Hospital, and Primary Children's Hospital | Murray, Ogden, Provo, and Salt Lake City, UT | Non-Author Contributor                                  |                                                                                            |
| Kimberlee                         | Weaver-Lewis |                       | RN MS            | University of Utah Medical Center, Intermountain Medical Center, McKay-Dee Hospital, Utah Valley Hospital, and Primary Children's Hospital | Murray, Ogden, Provo, and Salt Lake City, UT | Non-Author Contributor                                  |                                                                                            |
| Kathryn D.                        | Woodbury     |                       | RN BSN           | University of Utah Medical Center, Intermountain Medical Center, McKay-Dee Hospital, Utah Valley Hospital, and Primary Children's Hospital | Murray, Ogden, Provo, and Salt Lake City, UT | Non-Author Contributor                                  |                                                                                            |
| Seetha                            | Shankaran    |                       | MD               | Wayne State University, Hutzel Women's Hospital, and Children's Hospital of Michigan                                                       | Detroit, MI                                  | Non-Author Contributor                                  |                                                                                            |
| Rebecca                           | Bara         |                       | RN BSN           | Wayne State University, Hutzel Women's Hospital, and Children's Hospital of Michigan                                                       | Detroit, MI                                  | Non-Author Contributor                                  |                                                                                            |
| Prashant                          | Agarwal      |                       | MD               | Wayne State University, Hutzel Women's Hospital, and Children's Hospital of Michigan                                                       | Detroit, MI                                  | Non-Author Contributor                                  |                                                                                            |

## Supplemental Online Content: Nonauthor Collaborators

\*First name, last name, and suffix (if applicable) are required and will appear in PubMed.

| *First Name and Middle Initial(s) | *Last Name | *Suffix (eg, Jr, III) | Academic Degrees | Institution                                                                          | Location (city, state/province, country) | Role or Contribution, eg, chair, principal investigator | Group (if more than 1 Group listed in the byline) and/or Subgroup (eg, Steering Committee) |
|-----------------------------------|------------|-----------------------|------------------|--------------------------------------------------------------------------------------|------------------------------------------|---------------------------------------------------------|--------------------------------------------------------------------------------------------|
| Monika                            | Bajaj      |                       | MD               | Wayne State University, Hutzel Women's Hospital, and Children's Hospital of Michigan | Detroit, MI                              | Non-Author Contributor                                  |                                                                                            |
| Kirsten                           | Childs     |                       | RN BSN           | Wayne State University, Hutzel Women's Hospital, and Children's Hospital of Michigan | Detroit, MI                              | Non-Author Contributor                                  |                                                                                            |
| Melissa                           | February   |                       | MD               | Wayne State University, Hutzel Women's Hospital, and Children's Hospital of Michigan | Detroit, MI                              | Non-Author Contributor                                  |                                                                                            |
| Laura                             | Goldston   |                       | MA               | Wayne State University, Hutzel Women's Hospital, and Children's Hospital of Michigan | Detroit, MI                              | Non-Author Contributor                                  |                                                                                            |
| Mary E.                           | Johnson    |                       | RN BSN           | Wayne State University, Hutzel Women's Hospital, and Children's Hospital of Michigan | Detroit, MI                              | Non-Author Contributor                                  |                                                                                            |
| Girija                            | Natarajan  |                       | MD               | Wayne State University, Hutzel Women's Hospital, and Children's Hospital of Michigan | Detroit, MI                              | Non-Author Contributor                                  |                                                                                            |
| Bogdan                            | Panaiteacu |                       | MD PhD           | Wayne State University, Hutzel Women's Hospital, and Children's Hospital of Michigan | Detroit, MI                              | Non-Author Contributor                                  |                                                                                            |
| Eunice                            | Woldt      |                       | RN MSN           | Wayne State University, Hutzel Women's Hospital, and Children's Hospital of Michigan | Detroit, MI                              | Non-Author Contributor                                  |                                                                                            |
