# Supplementary material for: Tissue Oxygenation Changes After Transfusion and Outcomes in Preterm Infants: A Secondary Near-Infrared Spectroscopy Study of the Transfusion of Prematures Randomized Clinical Trial (TOP NIRS)
Source: PubMed Central journal article supplement (PMC10514737; doi:10.1001/jamanetworkopen.2023.34889), 2023-09-21
Supplement: jamanetwopen-e2334889-s004.pdf [file jamanetwopen-e2334889-s004.pdf]

## Data Sharing Statement

Chock. Tissue Oxygenation Changes After Transfusion and Outcomes in Preterm Infants. *JAMA Netw Open*. Published September 21, 2023. doi:10.1001/jamanetworkopen.2023.34889

### Data

**Data available:** Yes

**Data types:** Deidentified participant data

**How to access data:** Data reported in this paper is planned for release to the NHLBI Biospecimen and Data Repository at <https://biolincc.nhlbi.nih.gov/home/>. If required sooner, this data may be requested through a data use agreement. Further details are available at <https://neonatal.rti.org/index.cfm?fuseaction=DataRequest.Home>

**When available:** With publication

### Supporting Documents

**Document types:** None

### Additional Information

**Who can access the data:** Researchers whose proposed use of the data has been approved

**Types of analyses:** For a specified purpose

**Mechanisms of data availability:** Data will be made available after approval of proposal and with data use agreement
